# Supplementary material for: Genomics of ADME gene expression: mapping expression quantitative trait loci relevant for absorption, distribution, metabolism and excretion of drugs in human liver
Source: PubMed Central journal article supplement — Pharmacogenomics J. 2011 Oct 18;13(1):12–20. doi: 10.1038/tpj.2011.44 (PMC3564008; doi:10.1038/tpj.2011.44), 2011-10-18

# Figure S1: Box plots of novel associations

Box-and-whisker diagrams include smallest gene expression values, lower quartiles, medians, upper quartiles, largest gene expression values, and outliers of one representative association for each of the 31 trait genes uniquely identified in this study

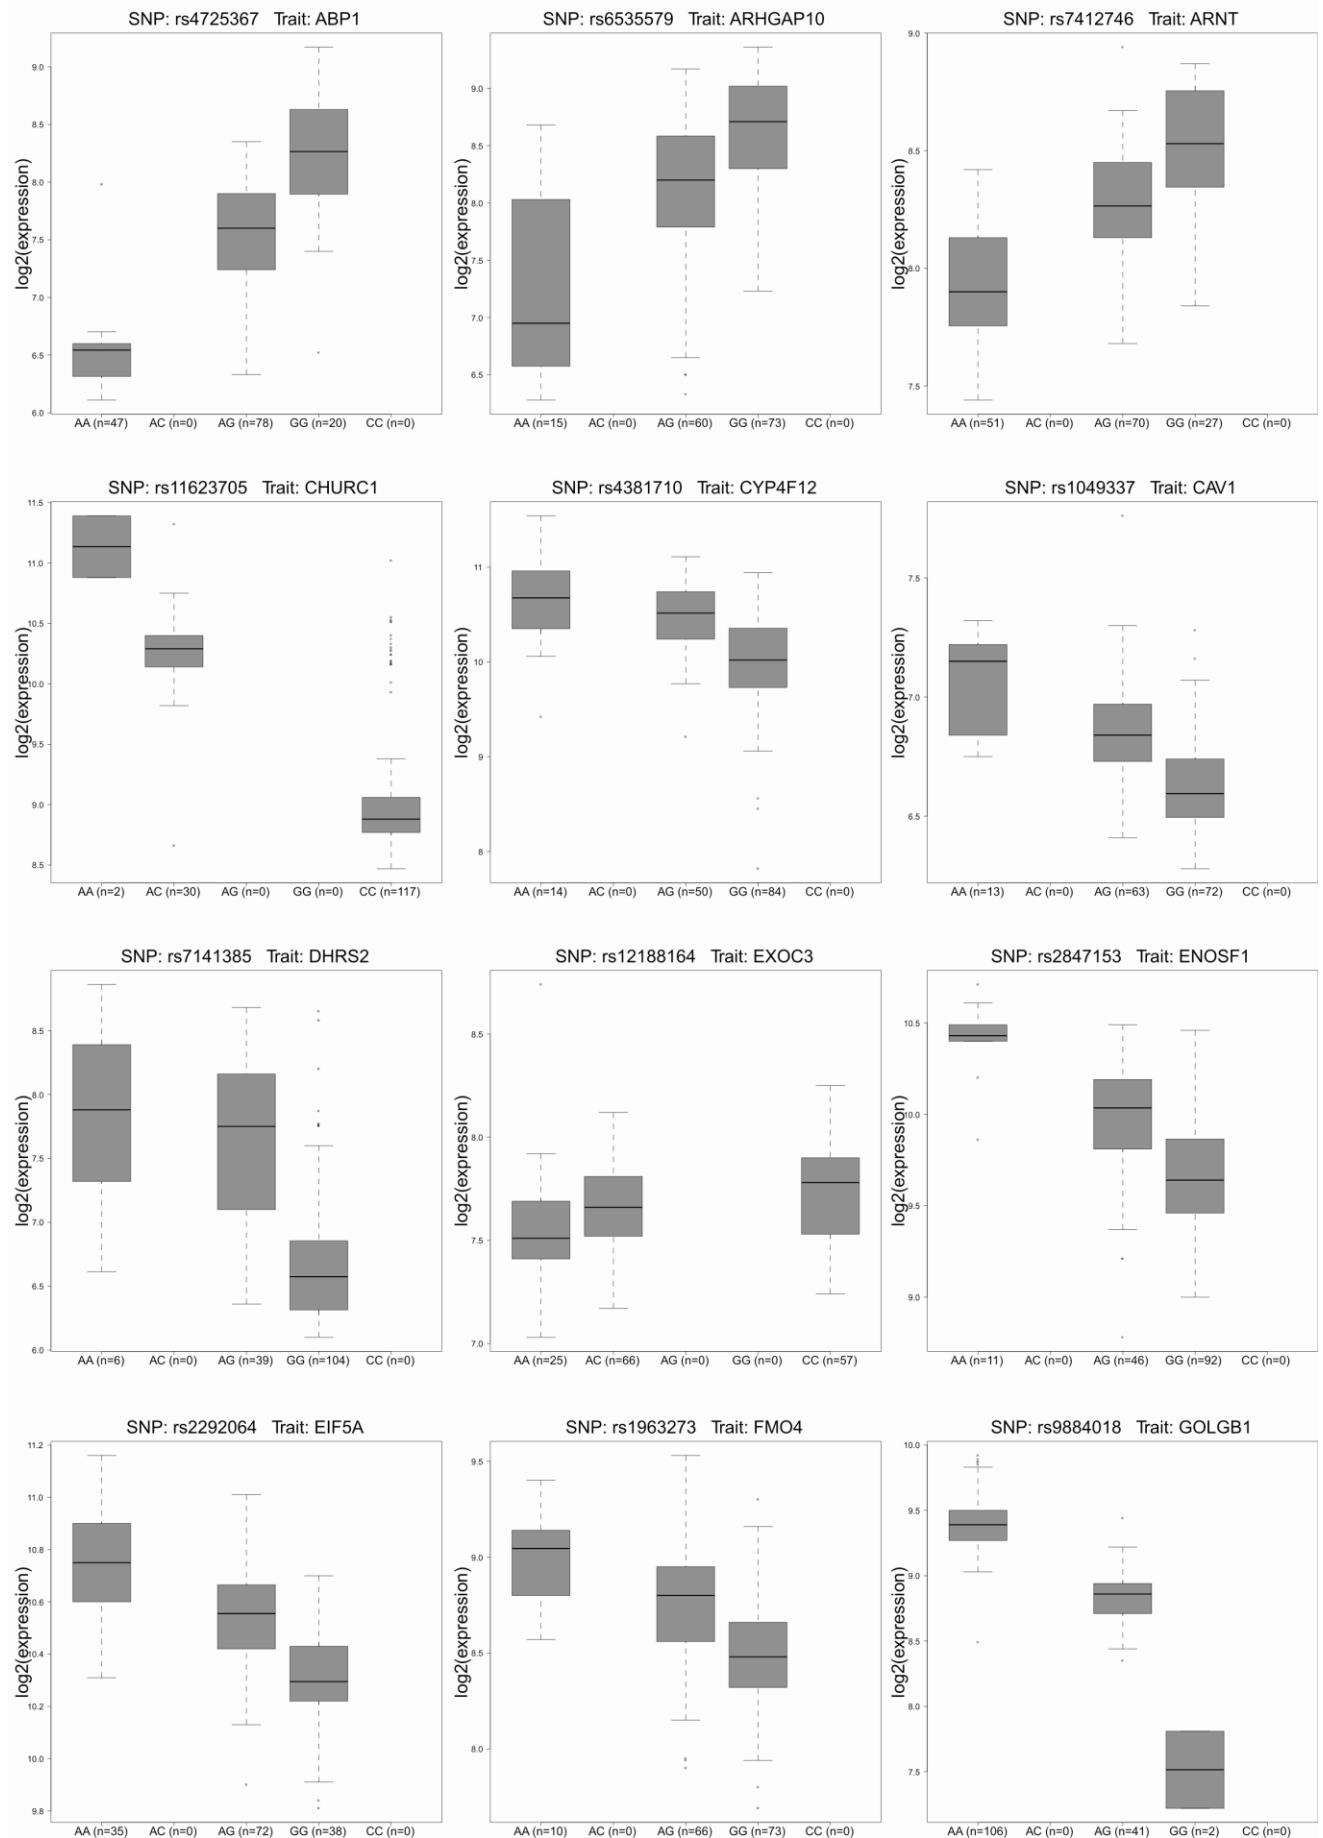

**Figure S1 (continued)**

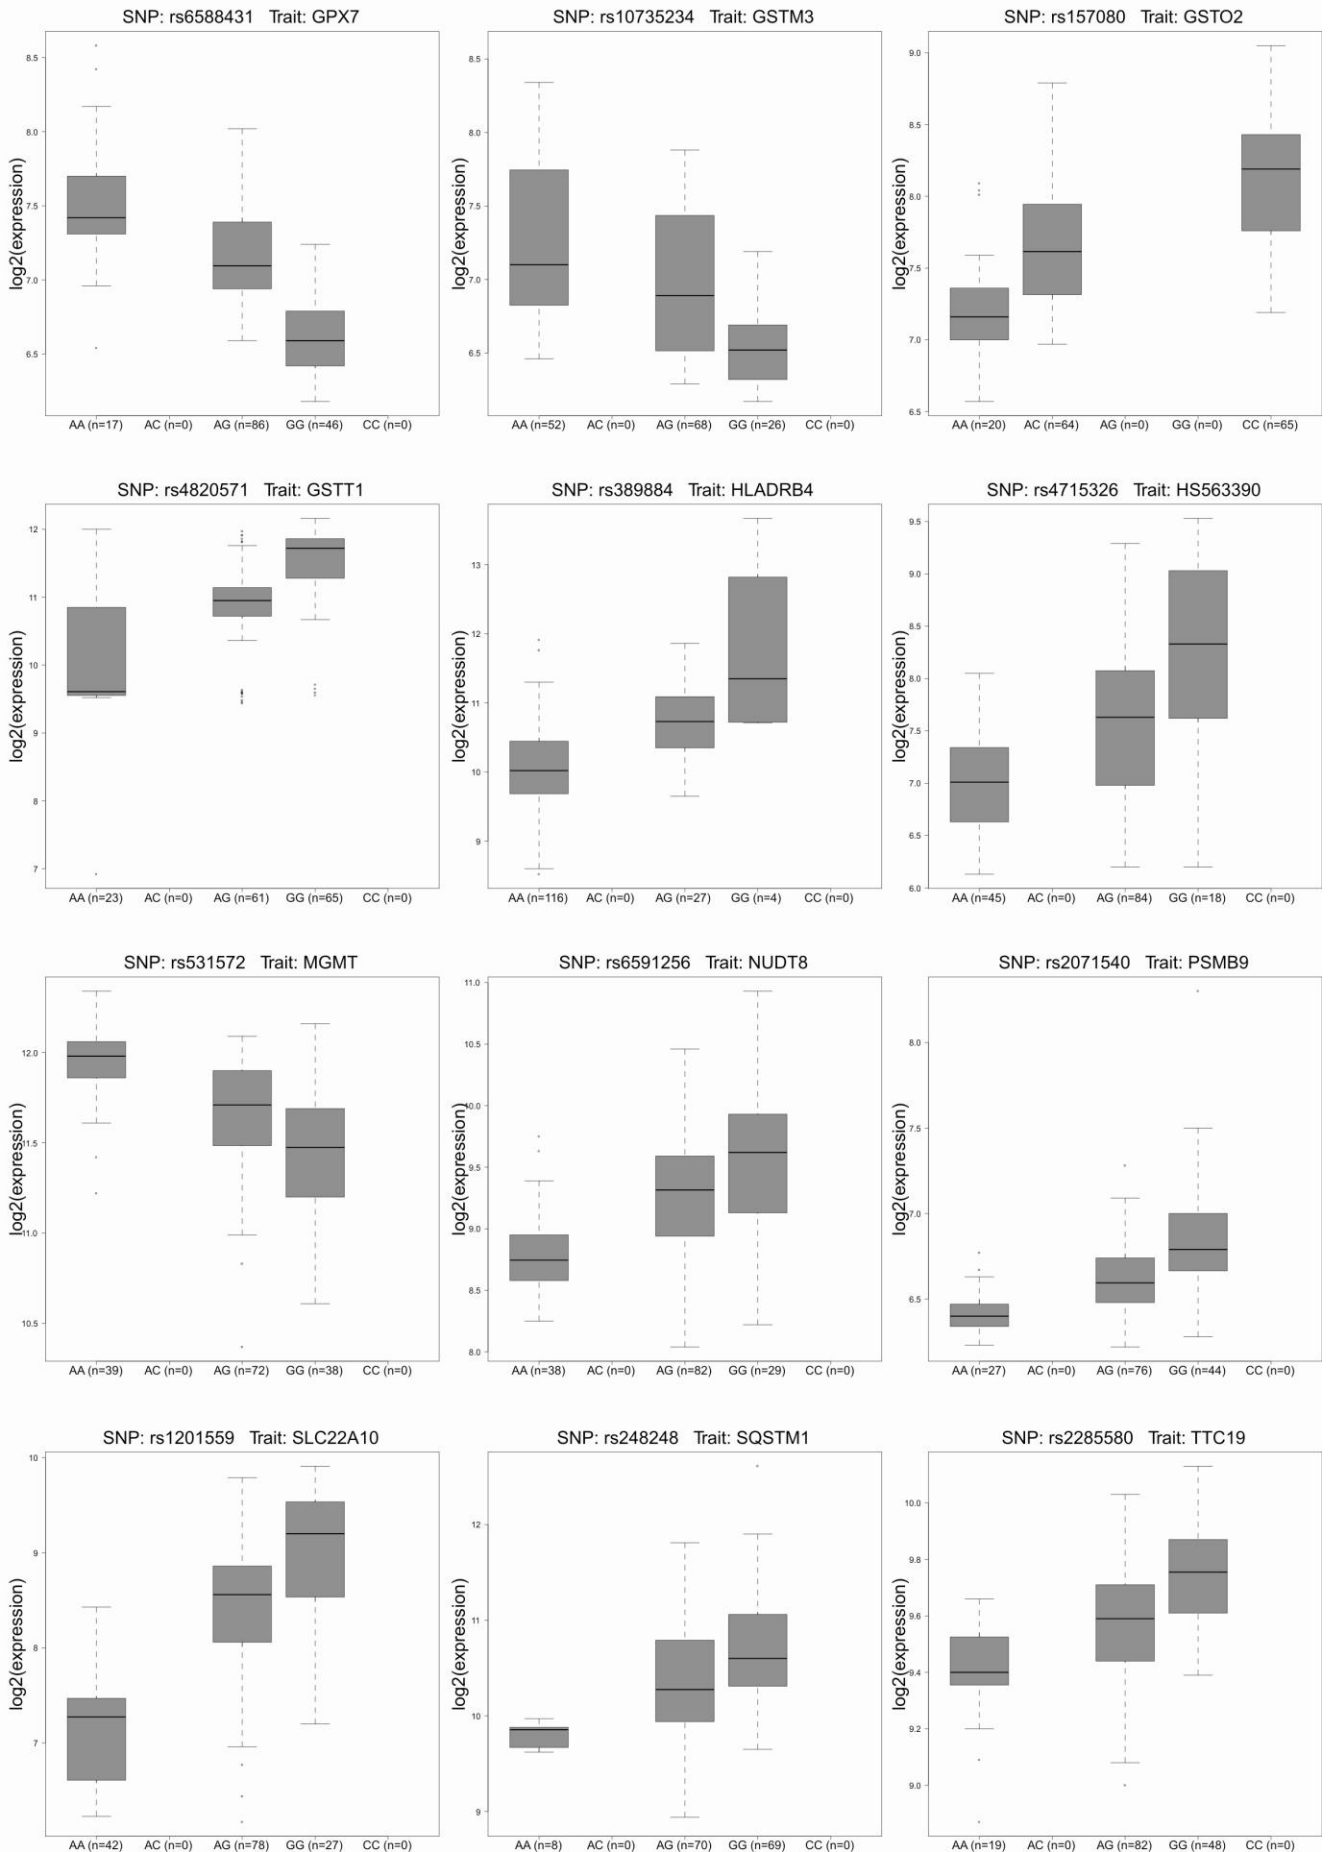

**Figure S1 (continued)**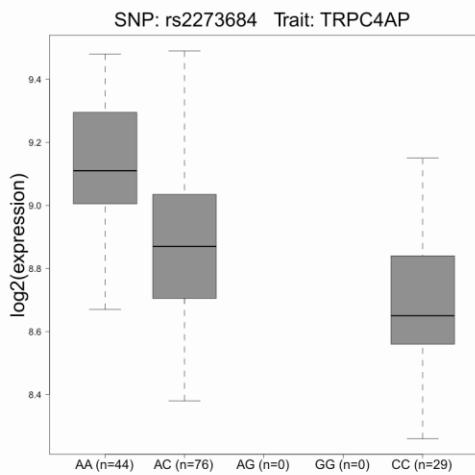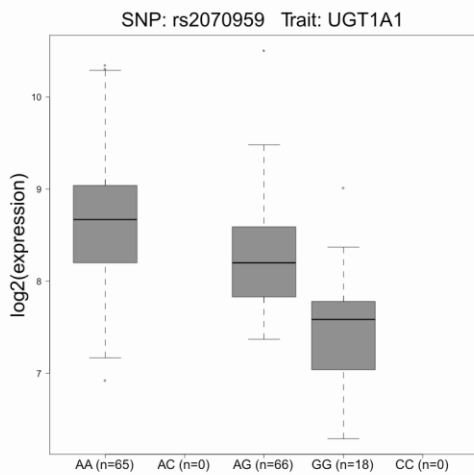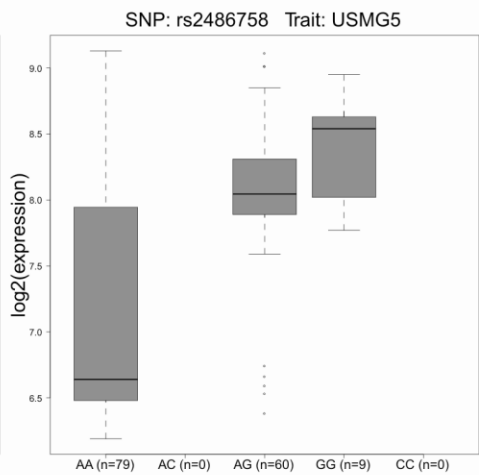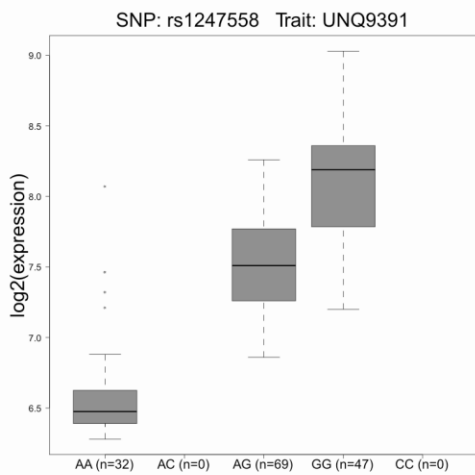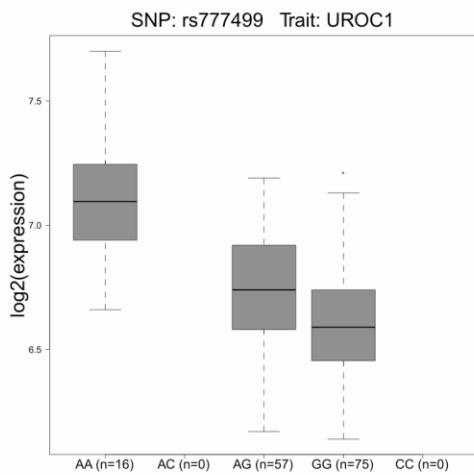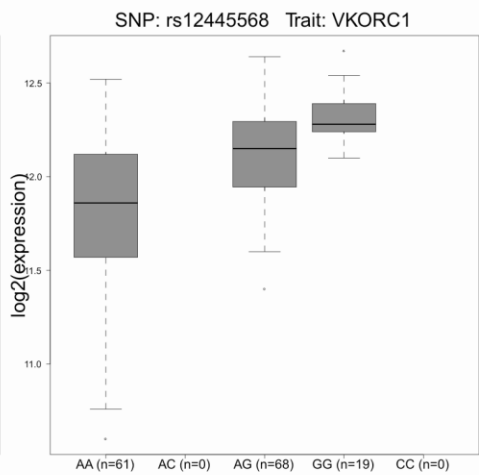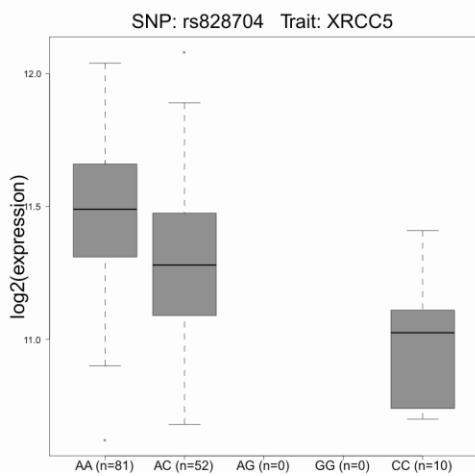

Supplement: tpj201144x1.pdf [file tpj201144x1.pdf]
